# Supplementary material
Source: Elsevier journal article supplement (https://www.sciencedirect.com/science/article/pii/S030105461830051X)
Supplement: mmc1 [file S030105461830051X:mmc1.docx]

**Questionnaire**

Case ( ) Control ( )

Age ____ years Sex: (0) Female (1) Male

Type of allergic diseases: ( ) Asthma ( ) Allergic rhinitis ( ) Atopic dermatitis

Skin prick test positive to:

House dust mite ( ) Epithelium (dog or cat) ( ) Cockroach mix ( )

Weeds ( ) Grasses ( ) Trees ( ) Fungi ( )

Presence of dogs in house: Yes ( ) No ( )

Familiar history of allergic diseases:

Asthma: Mother ( ) Father ( )

Allergic rhinitis: Mother ( ) Father ( )

Atopic dermatitis: Mother ( ) Father ( )

Childbirth way: Vaginal ( ) Cesarean ( )

Smoking while pregnant: Yes ( ) No ( )

Breastfeeding:

At least once: Yes ( ) No ( )

Exclusive: ____ months

Total duration: ____ months

Introduction to complementary foods, age: ____ months

Age of introduction (months):

Whole cow’s milk ____

Citrics ______

Wheat ______

Fish and seafood ____

Peanut ______

Egg _________
